# Supplementary material
Source: PubMed Central journal article supplement (PMC8286985)

# Supplementary Figure 1

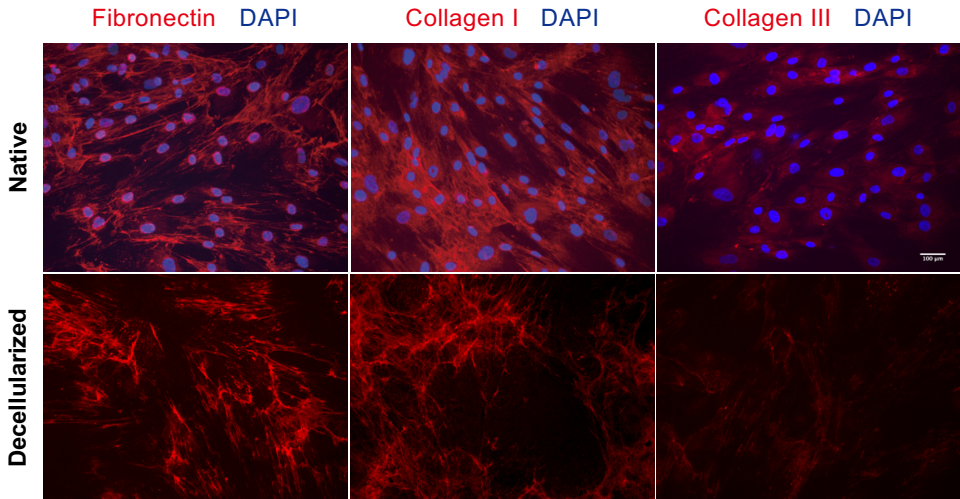

Supplement: NIHMS1686529-supplement-Supplementary_Figure_1.pdf [file NIHMS1686529-supplement-Supplementary_Figure_1.pdf]

# Supplementary Figure 10

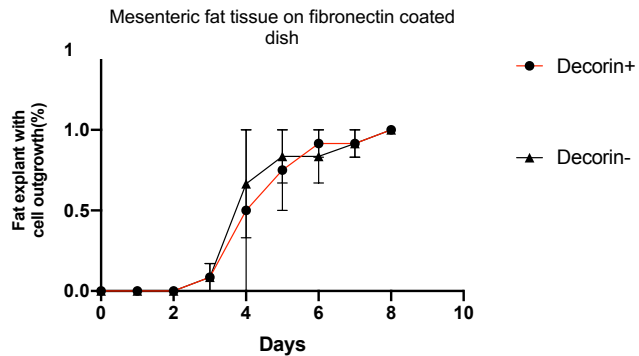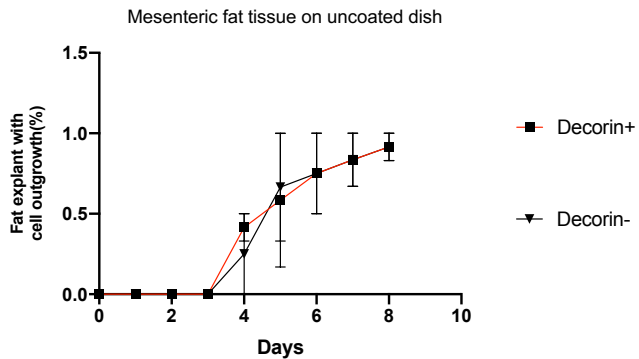

Supplement: NIHMS1686529-supplement-Supplementary_Figure_10.pdf [file NIHMS1686529-supplement-Supplementary_Figure_10.pdf]

# Supplementary Figure 11

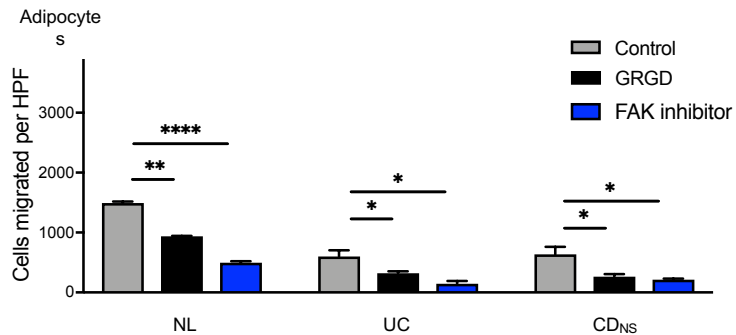

Supplement: NIHMS1686529-supplement-Supplementary_Figure_11.pdf [file NIHMS1686529-supplement-Supplementary_Figure_11.pdf]

# Supplementary Figure 12

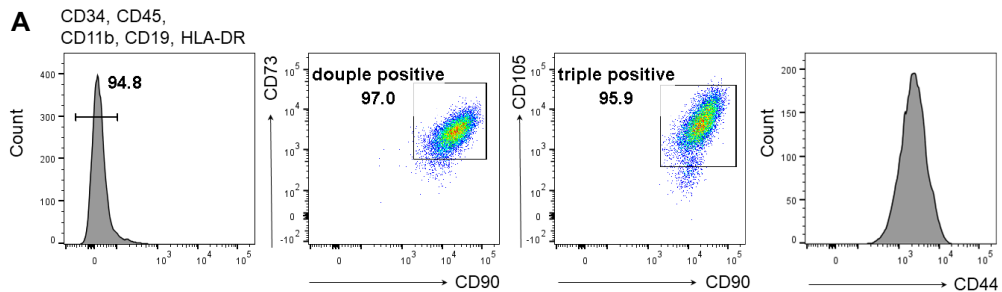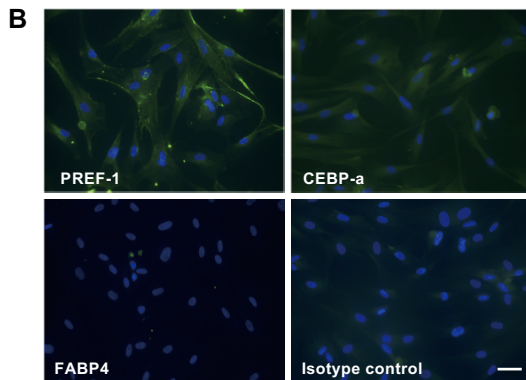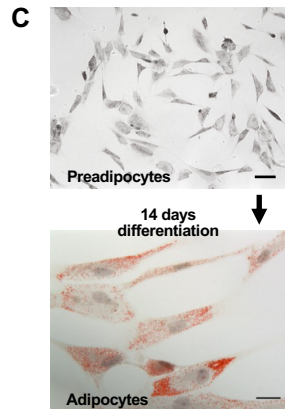

Supplement: NIHMS1686529-supplement-Supplementary_Figure_12.pdf [file NIHMS1686529-supplement-Supplementary_Figure_12.pdf]

# Supplementary Figure 13

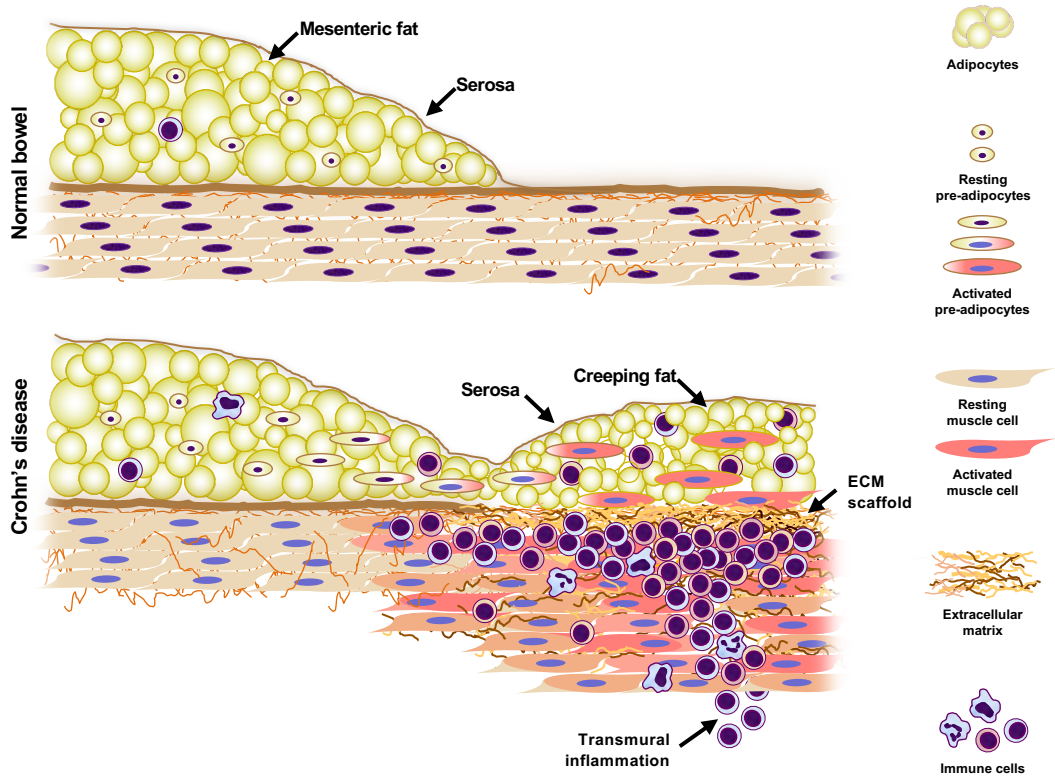

Supplement: NIHMS1686529-supplement-Supplementary_Figure_13.pdf [file NIHMS1686529-supplement-Supplementary_Figure_13.pdf]

## Supplementary Figure 2

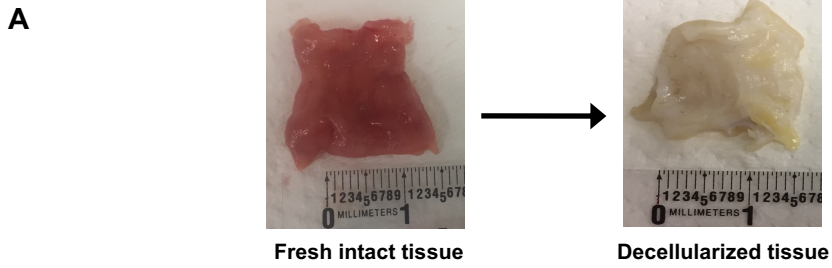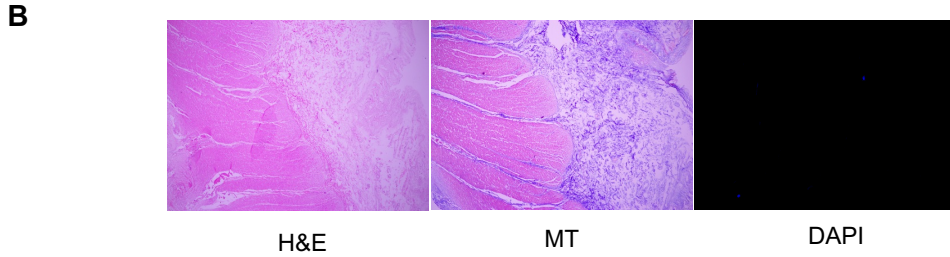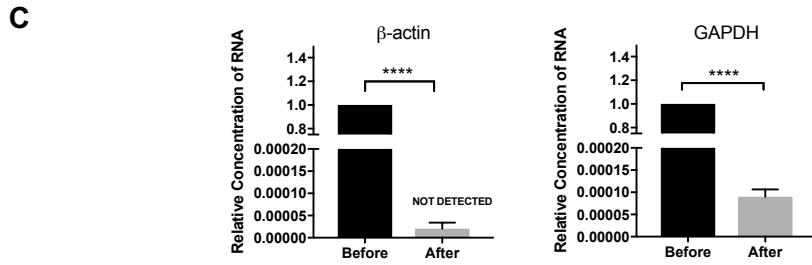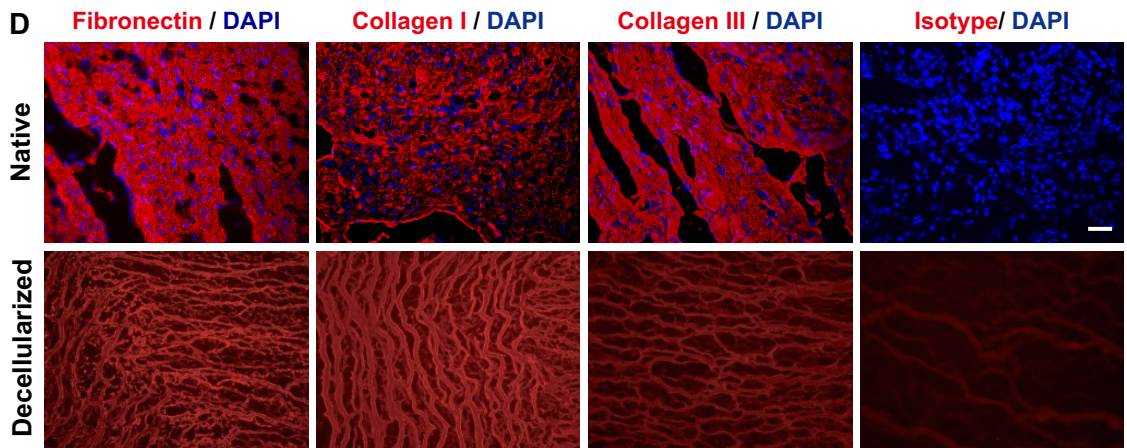

Supplement: NIHMS1686529-supplement-Supplementary_Figure_2.pdf [file NIHMS1686529-supplement-Supplementary_Figure_2.pdf]

## Supplementary Figure 3

Dissected muscularis propria

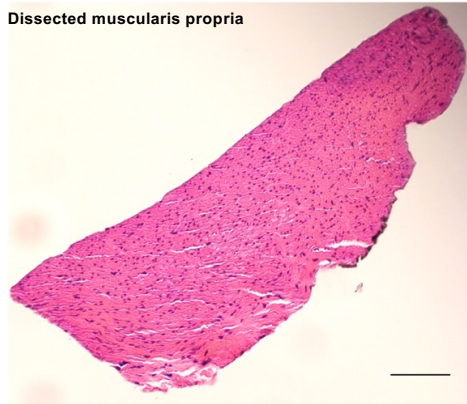

Supplement: NIHMS1686529-supplement-Supplementary_Figure_3.pdf [file NIHMS1686529-supplement-Supplementary_Figure_3.pdf]

# Supplementary Figure 4

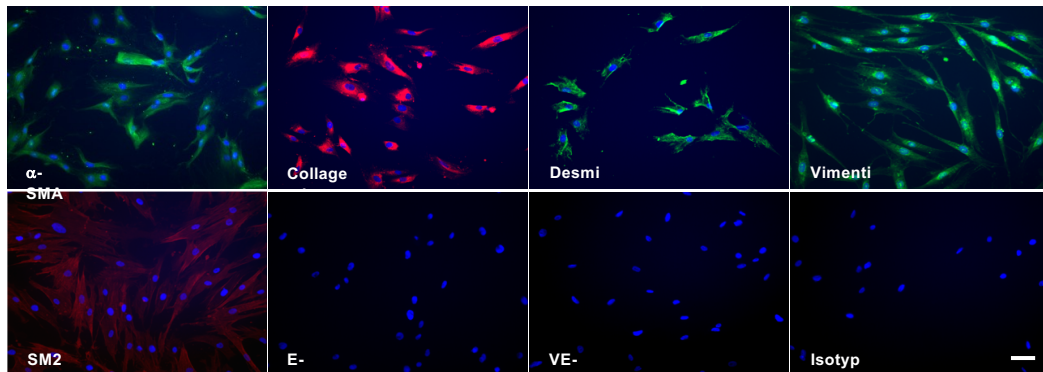

Supplement: NIHMS1686529-supplement-Supplementary_Figure_4.pdf [file NIHMS1686529-supplement-Supplementary_Figure_4.pdf]

# Supplementary Figure 5

## Diversity

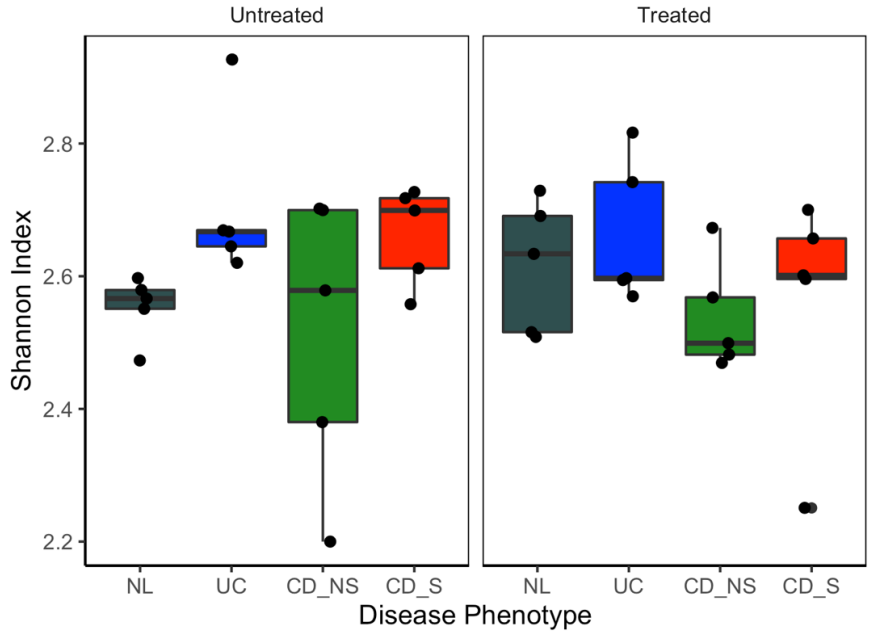

Supplement: NIHMS1686529-supplement-Supplementary_Figure_5.pdf [file NIHMS1686529-supplement-Supplementary_Figure_5.pdf]

# Supplementary Figure 6

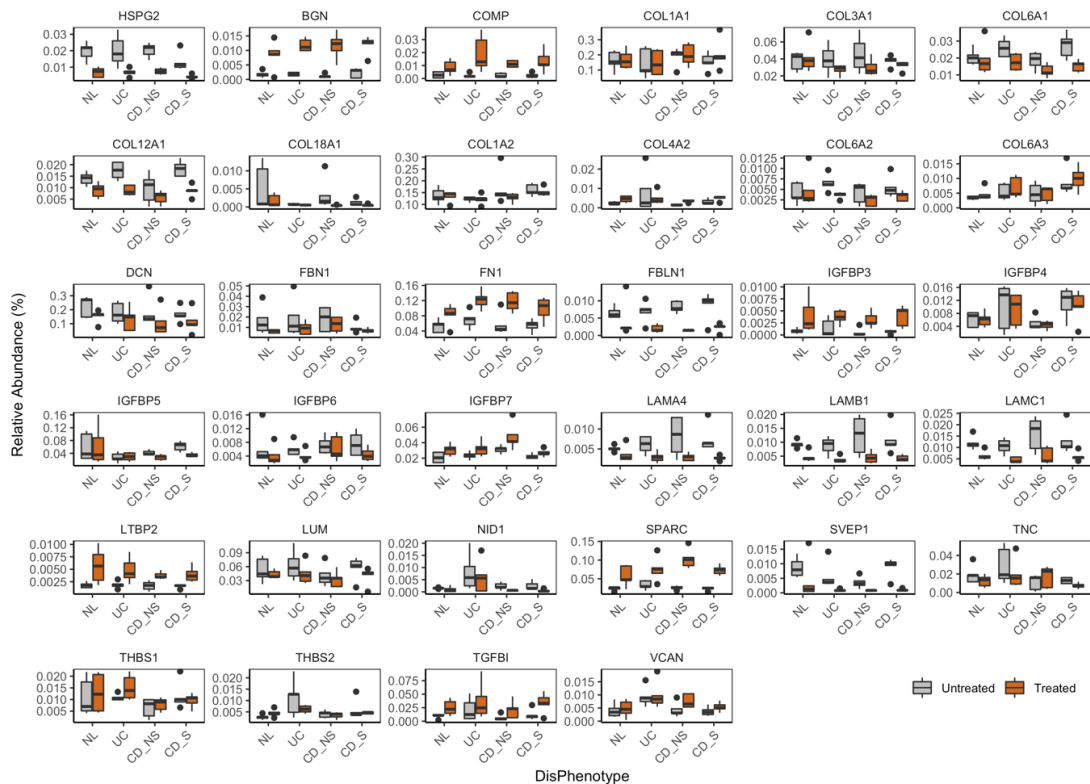

Supplement: NIHMS1686529-supplement-Supplementary_Figure_6.pdf [file NIHMS1686529-supplement-Supplementary_Figure_6.pdf]

# Supplementary Figure 7

## A Adipocytes

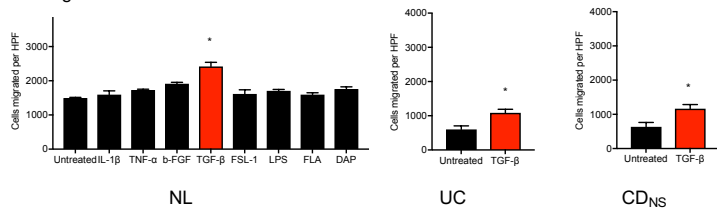

## B Adipocytes

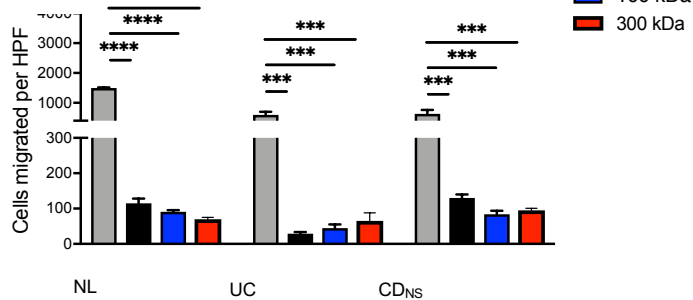

Supplement: NIHMS1686529-supplement-Supplementary_Figure_7.pdf [file NIHMS1686529-supplement-Supplementary_Figure_7.pdf]

# Supplementary Figure 8

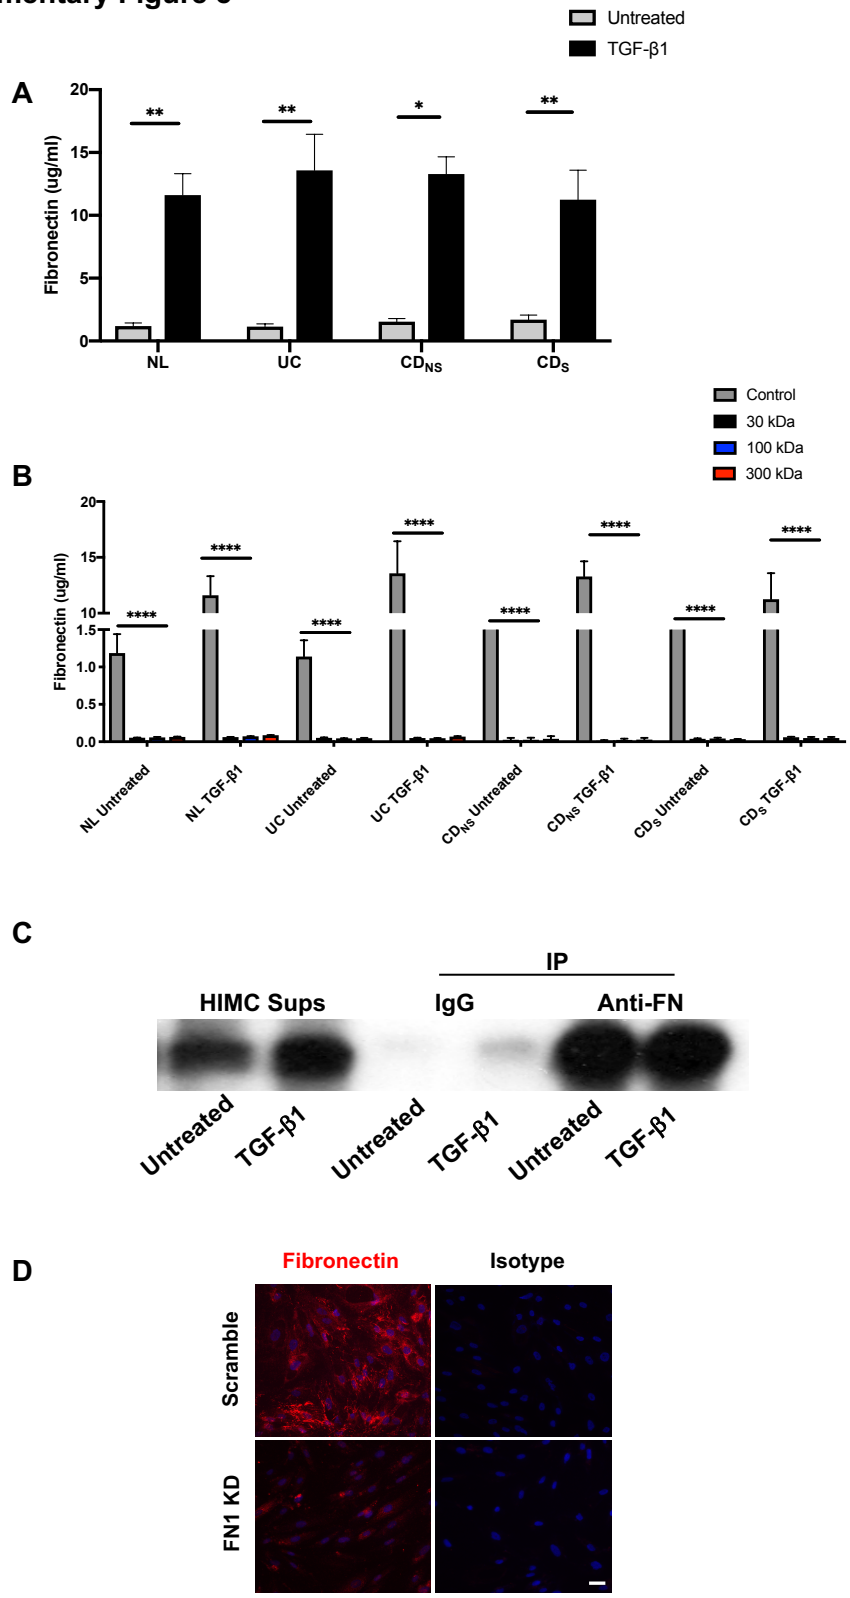

Supplement: NIHMS1686529-supplement-Supplementary_Figure_8.pdf [file NIHMS1686529-supplement-Supplementary_Figure_8.pdf]

Supplementary Figure 9

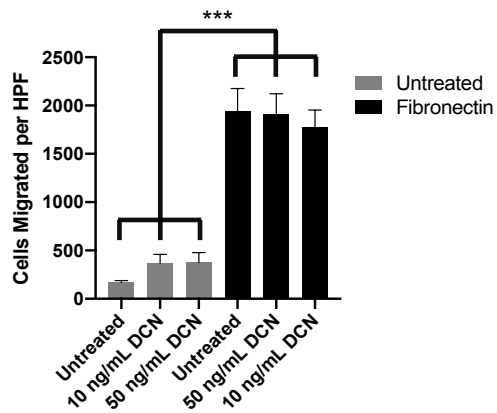

Supplement: NIHMS1686529-supplement-Supplementary_Figure_9.pdf [file NIHMS1686529-supplement-Supplementary_Figure_9.pdf]
